# Supplementary material for: Predictors for outcome in acute lateral epicondylitis
Source: Springer Nature journal article supplement (doi:10.1186/s12891-019-2758-y), 2019-08-17
Supplement: MOESM1 [file 17079084]

**Table 2: Univariate logistic showing the effects of each prognostic indicator on treatment success**

| Covariates                                                   | 6 weeks           |         | 12 weeks          |         | 26 weeks           |         | 52 weeks           |         |
|--------------------------------------------------------------|-------------------|---------|-------------------|---------|--------------------|---------|--------------------|---------|
|                                                              | OR (95 % CI)      | P-value | OR (95 % CI)      | P-value | OR (95 % CI)       | P-value | OR (95 % CI)       | P-value |
| Age                                                          | 0.99 (0.95, 1.03) | 0.57    | 1.00 (0.96, 1.04) | 0.94    | 0.96 (0.92, 1.01)  | 0.11    | 1.00 (0.96, 1.04)  | 0.90    |
| Female (ref: male)                                           | 1.20 (0.58, 2.50) | 0.62    | 0.81 (0.40, 1.66) | 0.57    | 0.95 (0.39, 2.31)  | 0.91    | 0.67 (0.30, 1.51)  | 0.34    |
| Marital status (ref: unmarried/widow(er))                    |                   |         |                   |         |                    |         |                    |         |
| Married/cohabiting                                           | 0.91 (0.40, 2.11) | 0.83    | 0.47 (0.21, 1.08) | 0.08    | 1.30 (0.49, 3.47)  | 0.60    | 1.36 (0.54, 3.44)  | 0.52    |
| Level of education x time (ref. primary or secondary school) |                   |         |                   |         |                    |         |                    |         |
| <i>College or university</i>                                 | 0.69 (0.31, 1.54) | 0.36    | 0.48 (0.22, 1.05) | 0.07    | 0.54 (0.19, 1.51)  | 0.24    | 0.97 (0.41, 2.29)  | 0.95    |
| Excercises regularly                                         | 0.54 (0.26, 1.13) | 0.10    | 0.58 (0.29, 1.17) | 0.13    | 2.13 (0.86, 5.27)  | 0.10    | 1.22 (0.55, 2.74)  | 0.62    |
| Paid work                                                    | 0.74 (0.26, 2.06) | 0.56    | 0.22 (0.07, 0.72) | 0.01    | 1.08 (0.28, 4.18)  | 0.91    | 0.15 (0.02, 1.19)  | 0.07    |
| Manual work                                                  | 1.06 (0.49, 2.29) | 0.88    | 1.16 (0.55, 2.45) | 0.69    | 1.34 (0.53, 3.42)  | 0.54    | 0.18 (0.07, 0.50)  | < 0.01  |
| On paid sick-leave now                                       | 3.14 (1.37, 7.16) | 0.01    | 2.10 (0.93, 4.75) | 0.08    | 0.77 (0.28, 2.09)  | 0.61    | 0.55 (0.22, 1.32)  | 0.18    |
| Duration of complaints (in weeks)                            | 0.98 (0.88, 1.10) | 0.77    | 0.97 (0.86, 1.09) | 0.60    | 0.98 (0.85, 1.13)  | 0.77    | 1.13 (0.99, 1.31)  | 0.08    |
| Dominant elbow affected                                      | 0.83 (0.38, 1.84) | 0.65    | 1.58 (0.72, 3.49) | 0.25    | 1.54 (0.58, 4.12)  | 0.39    | 2.19 (0.94, 5.11)  | 0.07    |
| Pain every day last week                                     | 0.74 (0.13, 4.28) | 0.74    | 1.11 (0.18, 6.96) | 0.91    | 0.54 (0.04, 6.96)  | 0.64    | -                  | -       |
| Use of analgetics last week                                  | 1.72 (0.76, 3.91) | 0.20    | 1.58 (0.69, 3.63) | 0.28    | 2.22 (0.80, 6.18)  | 0.13    | 0.86 (0.34, 2.14)  | 0.74    |
| Acute start of symptoms                                      | 0.78 (0.38, 1.62) | 0.51    | 0.99 (0.49, 2.00) | 0.97    | 1.43 (0.58, 3.51)  | 0.44    | 0.97 (0.43, 2.17)  | 0.94    |
| Similar complaints earlier                                   | 1.61 (0.69, 3.78) | 0.27    | 0.76 (0.32, 1.78) | 0.52    | 0.35 (0.12, 0.97)  | 0.04    | 0.69 (0.27, 1.76)  | 0.44    |
| Probable overuse, usual activity                             | 0.68 (0.32, 1.44) | 0.31    | 0.61 (0.29, 1.28) | 0.19    | 0.77 (0.31, 1.92)  | 0.58    | 0.20 (0.07, 0.59)  | < 0.01  |
| Probable overuse, unusual activity                           | 1.55 (0.74, 3.26) | 0.25    | 1.77 (0.85, 3.71) | 0.13    | 1.44 (0.57, 3.59)  | 0.44    | 4.91 (1.68, 14.41) | < 0.01  |
| Patients preference for treatment: Physiotherapy             | 1.68 (0.80, 3.54) | 0.17    | 1.13 (0.55, 2.34) | 0.74    | 0.64 (0.25, 1.63)  | 0.35    | 0.61 (0.27, 1.37)  | 0.23    |
| Patients preference for treatment: Injection                 | 1.24 (0.52, 2.96) | 0.62    | 1.58 (0.67, 3.74) | 0.30    | 0.71 (0.27, 1.87)  | 0.49    | 2.58 (0.79, 8.47)  | 0.12    |
| Patients preference for treatment: Wait-and-see              | 0.12 (0.01, 1.12) | 0.06    | 0.36 (0.07, 1.78) | 0.21    | 2.77 (0.26, 29.83) | 0.40    | 0.36 (0.08, 1.68)  | 0.19    |
| Patients preference for treatment: No preference             | 0.75 (0.34, 1.65) | 0.47    | 0.84 (0.40, 1.78) | 0.66    | 1.98 (0.73, 5.35)  | 0.18    | 1.20 (0.50, 2.90)  | 0.68    |
| Pain score on VAS                                            | 1.00 (0.99, 1.02) | 0.62    | 0.99 (0.97, 1.01) | 0.16    | 0.97 (0.94, 0.99)  | 0.01    | 0.97 (0.95, 0.99)  | 0.01    |
| Affected function on VAS                                     | 0.93 (0.91, 0.96) | < 0.01  | 0.93 (0.91, 0.95) | < 0.01  | 0.90 (0.87, 0.94)  | < 0.01  | 0.92 (0.89, 0.94)  | < 0.01  |
| Overall complaints on VAS                                    | 0.93 (0.90, 0.95) | < 0.01  | 0.91 (0.88, 0.93) | < 0.01  | 0.89 (0.85, 0.93)  | < 0.01  | 0.89 (0.86, 0.92)  | < 0.01  |
| Pain free grip strength ratio                                | 0.73 (0.18, 2.94) | 0.66    | 0.43 (0.11, 1.72) | 0.23    | 1.75 (0.31, 9.80)  | 0.53    | 0.55 (0.11, 2.72)  | 0.47    |
| Maximum grip strength ratio                                  | 0.41 (0.12, 1.34) | 0.14    | 0.54 (0.18, 1.60) | 0.27    | 0.99 (0.20, 4.88)  | 0.99    | 1.04 (0.35, 3.13)  | 0.94    |
| Pain Free Function Index                                     | 0.43 (0.31, 0.60) | < 0.01  | 0.51 (0.40, 0.66) | < 0.01  | 0.47 (0.34, 0.64)  | < 0.01  | 0.57 (0.46, 0.72)  | < 0.01  |
| Pain free isometric (wrist): ref. None                       |                   |         |                   |         |                    |         |                    |         |
| <i>Some or distinct pain</i>                                 | 0.04 (0.01, 0.14) | < 0.01  | 0.19 (0.06, 0.55) | < 0.01  | 0.13 (0.04, 0.44)  | < 0.01  | 0.07 (0.02, 0.23)  | < 0.01  |
| Pain free isometric(finger): ref. None                       |                   |         |                   |         |                    |         |                    |         |
| <i>Some or distinct pain</i>                                 | 0.15 (0.06, 0.34) | < 0.01  | 0.19 (0.08, 0.43) | < 0.01  | 0.35 (0.14, 0.87)  | 0.02    | 0.16 (0.07, 0.37)  | < 0.01  |
