# Supplementary material for: Predictors for outcome in acute lateral epicondylitis
Source: Springer Nature journal article supplement (doi:10.1186/s12891-019-2758-y), 2019-08-17
Supplement: MOESM2 [file 17079084]

**Table 3 Adjusted multilevel logistic regression showing the effects of each prognostic indicator on treatment success (based on  $P \leq 0.05$  from the univariate analysis)**

| Covariates at baseline                                                 | 6 weeks            |         | 12 weeks           |         | 26 weeks           |         | 52 weeks           |         |
|------------------------------------------------------------------------|--------------------|---------|--------------------|---------|--------------------|---------|--------------------|---------|
|                                                                        | OR (95 % CI)       | P-value | OR (95 % CI)       | P-value | OR (95 % CI)       | P-value | OR (95 % CI)       | P-value |
| Age                                                                    | 0.94 (0.87, 1.02)  | 0.16    | 1.00 (0.94, 1.05)  | 0.92    | 1.00 (0.93, 1.07)  | 0.96    | 0.95 (0.89, 1.03)  | 0.20    |
| Female (ref: Male)                                                     | 2.50 (0.72, 8.69)  | 0.15    | 1.04 (0.37, 2.92)  | 0.94    | 3.23 (1.01, 10.28) | 0.05    | 1.08 (0.37, 3.20)  | 0.89    |
| On paid work                                                           | 0.87 (0.03, 21.66) | 0.93    | 0.53 (0.02, 11.42) | 0.68    | 0.53 (0.02, 11.42) | 0.68    | 0.53 (0.02, 11.41) | 0.68    |
| Manual labor                                                           | 0.66 (0.18, 2.44)  | 0.53    | 2.01 (0.66, 6.12)  | 0.22    | 1.78 (0.51, 6.26)  | 0.37    | 0.33 (0.09, 1.13)  | 0.08    |
| On paid sick leave at time of follow up                                | 6.15 (1.42, 26.60) | 0.02*   | 5.09 (1.45, 17.88) | 0.01*   | 0.71 (0.18, 2.75)  | 0.62    | 0.84 (0.25, 2.80)  | 0.78    |
| Similar complaints earlier                                             | 5.94 (1.52, 23.19) | 0.01*   | 0.71 (0.22, 2.32)  | 0.57    | 0.20 (0.05, 0.89)  | 0.03*   | 0.68 (0.20, 2.36)  | 0.54    |
| Probable overuse, unusual activity                                     | 2.82 (0.77, 10.25) | 0.12    | 3.70 (1.11, 12.33) | 0.03*   | 1.77 (0.50, 6.29)  | 0.38    | 1.78 (0.52, 6.03)  | 0.36    |
| Pain score on VAS                                                      | 1.01 (0.97, 1.05)  | 0.52    | 1.00 (0.97, 1.03)  | 0.89    | 0.99 (0.96, 1.02)  | 0.60    | 0.99 (0.96, 1.03)  | 0.71    |
| Affected function on VAS                                               | 1.03 (0.99, 1.07)  | 0.07    | 1.01 (0.98, 1.03)  | 0.71    | 0.98 (0.94, 1.01)  | 0.18    | 1.02 (0.98, 1.05)  | 0.33    |
| Overall complaints on VAS                                              | 1.01 (0.96, 1.05)  | 0.76    | 0.98 (0.95, 1.02)  | 0.31    | 1.02 (0.98, 1.06)  | 0.39    | 0.97 (0.93, 1.02)  | 0.24    |
| Pain Free Function Index                                               | 0.42 (0.28, 0.63)  | < 0.01* | 0.58 (0.45, 0.75)  | < 0.01* | 0.52 (0.37, 0.72)  | < 0.01* | 0.75 (0.61, 0.94)  | 0.01*   |
| Pain free isometric (wrist): ref. None<br><i>Some or distinct pain</i> | 0.15 (0.02, 1.10)  | 0.06    | 0.49 (0.07, 3.19)  | 0.45    | 0.56 (0.13, 2.39)  | 0.44    | 0.22 (0.05, 1.01)  | 0.06    |
| Pain free isometric(finger): ref. None<br><i>Some or distinct pain</i> | 0.61 (0.14, 2.75)  | 0.52    | 0.67 (0.20, 2.29)  | 0.53    | 0.69 (0.16, 2.87)  | 0.61    | 0.50 (0.16, 1.58)  | 0.24    |

\*)  $p < 0.05$
