# Supplementary material for: Predictors for outcome in acute lateral epicondylitis
Source: Springer Nature journal article supplement (doi:10.1186/s12891-019-2758-y), 2019-08-17
Supplement: MOESM3 [file 17079084]

**Table 4 Univariate multilevel linear regression (MLR) showing the effects of each prognostic indicator on Pain Score (VAS) at each study time point after adjusting for baseline pain on VAS**

| Covariates                                                   | 6 weeks                 |         | 12 weeks                |         | 26 weeks                |         | 52 weeks                |         |
|--------------------------------------------------------------|-------------------------|---------|-------------------------|---------|-------------------------|---------|-------------------------|---------|
|                                                              | $\beta$ (95 % CI)       | P-value | $\beta$ (95 % CI)       | P-value | $\beta$ (95 % CI)       | P-value | $\beta$ (95 % CI)       | P-value |
| Age                                                          | 0.002 (-0.34, 0.35)     | 0.99    | -0.06 (-0.40, 0.29)     | 0.74    | 0.45 (0.02, 0.87)       | 0.04    | -0.08 (-0.39, 0.23)     | 0.61    |
| Female (ref: male) x time                                    | -1.86 (-8.74, 5.03)     | 0.60    | 0.02 (-6.87, 6.90)      | 1.00    | 3.74 (-4.76, 12.23)     | 0.39    | 0.05 (-6.17, 6.27)      | 0.99    |
| Marital status (ref: unmarried or widow(er)) x time          |                         |         |                         |         |                         |         |                         |         |
| Married/cohabiting                                           | -5.40 (-13.29, 2.49)    | 0.18    | 10.73 (2.93, 18.53)     | 0.01    | -0.54 (-9.93, 8.85)     | 0.91    | 0.31 (-7.00, 7.61)      | 0.94    |
| Level of education x time (ref. primary or secondary school) |                         |         |                         |         |                         |         |                         |         |
| <i>College or University</i>                                 | -5.19 (-12.59, 2.21)    | 0.17    | 0.83 (-6.55, 8.20)      | 0.83    | -0.77 (-10.78, 9.24)    | 0.88    | -4.61 (-11.15, 1.92)    | 0.17    |
| Exercises regularly                                          | 4.54 (-2.21, 11.29)     | 0.19    | -2.93 (-9.66, 3.79)     | 0.39    | -5.61 (-14.03, 2.81)    | 0.19    | -0.63 (-6.65, 5.40)     | 0.84    |
| On paid work                                                 | 6.51 (-3.33, 16.35)     | 0.19    | 14.99 (4.82, 25.17)     | < 0.01  | -8.02 (-20.89, 4.85)    | 0.22    | 4.27 (-4.51, 13.06)     | 0.34    |
| Manual labour                                                | 3.24 (-3.78, 10.25)     | 0.37    | 0.05 (-7.02, 7.13)      | 0.99    | -3.83 (-12.64, 4.98)    | 0.40    | 6.17 (-0.07, 12.40)     | 0.06    |
| On paid sick-leave now                                       | -3.76 (-11.40, 3.88)    | 0.33    | -3.24 (-10.88, 4.40)    | 0.41    | 1.49 (-7.80, 10.79)     | 0.75    | 0.09 (-6.96, 7.15)      | 0.98    |
| Duration of complaints in weeks                              | 0.27 (-0.82, 1.35)      | 0.63    | -0.19 (-1.30, 0.92)     | 0.74    | 1.35 (0.03, 2.66)       | 0.04    | -0.10 (-1.12, 0.92)     | 0.85    |
| Dominant elbow affected                                      | -0.42 (-7.87, 7.03)     | 0.91    | 2.84 (-4.72, 10.40)     | 0.46    | -1.91 (-11.26, 7.44)    | 0.69    | -1.08 (-7.78, 5.61)     | 0.75    |
| Pain every day last week                                     | 12.14 (-5.01, 29.28)    | 0.17    | 8.72 (-8.25, 25.68)     | 0.31    | -1.03 (-23.45, 21.39)   | 0.93    | 2.42 (-12.62, 17.46)    | 0.75    |
| Use of analgesics last week                                  | -0.32 (-7.86, 7.22)     | 0.93    | 3.72 (-3.96, 11.40)     | 0.34    | 3.97 (-5.26, 13.21)     | 0.40    | 3.12 (-3.89, 10.13)     | 0.38    |
| Acute start of symptoms                                      | 6.15 (-0.61, 12.91)     | 0.08    | 3.26 (-3.54, 10.06)     | 0.35    | -9.40 (-17.92, -0.87)   | 0.03    | 4.95 (-1.12, 11.02)     | 0.11    |
| Similar complaints earlier                                   | -5.86 (-13.96, 2.25)    | 0.16    | -1.09 (-9.29, 7.11)     | 0.80    | 10.49 (0.87, 20.11)     | 0.03    | 2.02 (-5.40, 9.45)      | 0.59    |
| Probable over-use usual activity                             | 4.60 (-2.34, 11.55)     | 0.19    | 2.91 (-4.11, 9.93)      | 0.42    | 6.17 (-2.39, 14.73)     | 0.16    | 8.79 (2.45, 15.14)      | 0.01    |
| Probable over-use unusual activity                           | -5.46 (-12.40, 1.48)    | 0.12    | -4.19 (-11.22, 2.83)    | 0.24    | -7.00 (-15.59, 1.58)    | 0.11    | -8.71 (-15.03, -2.38)   | 0.01    |
| Patients preference for treatment: Physiotherapy             | -5.96 (-12.91, 0.98)    | 0.09    | -2.80 (-9.77, 4.17)     | 0.43    | 8.48 (-0.39, 17.36)     | 0.06    | 0.26 (-5.92, 6.44)      | 0.94    |
| Patients preference for treatment: Injection                 | 2.96 (-5.27, 11.19)     | 0.48    | -2.15 (-10.37, 6.07)    | 0.61    | 2.45 (-6.92, 11.81)     | 0.61    | -4.42 (-12.06, 3.22)    | 0.26    |
| Patients preference for treatment: Wait and see              | -0.61 (-14.43, 13.21)   | 0.93    | 4.26 (-10.74, 19.26)    | 0.58    | -8.87 (-27.30, 9.57)    | 0.35    | 10.27 (-2.83, 23.37)    | 0.12    |
| Patients preference for treatment: No preference             | 4.06 (-3.17, 11.29)     | 0.27    | 2.89 (-4.29, 10.07)     | 0.43    | -9.53 (-18.61, 0.45)    | 0.04    | 0.28 (-6.20, 6.75)      | 0.93    |
| Baseline pain on VAS                                         | 0.45 (0.28, 0.61)       | < 0.01  | 0.40 (0.24, 0.57)       | < 0.01  | 0.46 (0.26, 0.67)       | < 0.01  | 0.21 (0.05, 0.36)       | 0.01    |
| Affected function on VAS                                     | 0.60 (0.51, 0.70)       | < 0.01  | 0.67 (0.58, 0.77)       | < 0.01  | 0.78 (0.65, 0.91)       | < 0.01  | 0.73 (0.61, 0.84)       | < 0.01  |
| Overall complaints on VAS                                    | 0.73 (0.67, 0.79)       | < 0.01  | 0.82 (0.76, 0.88)       | < 0.01  | 0.95 (0.87, 1.04)       | < 0.01  | 0.83 (0.76, 0.91)       | < 0.01  |
| Pain free grip strength ratio                                | -42.74 (-52.01, -33.48) | < 0.01  | -29.52 (-37.90, -21.15) | < 0.01  | -25.12 (-34.07, -16.17) | < 0.01  | -31.94 (-41.46, -22.42) | < 0.01  |
| Maximum grip strength ratio                                  | -44.16 (-56.26, -32.06) | < 0.01  | -28.42 (-40.24, -16.59) | < 0.01  | -44.29 (-61.09, -27.49) | < 0.01  | -28.05 (-43.88, -12.22) | < 0.01  |
| Pain Free Function Index                                     | 6.49 (5.18, 7.81)       | < 0.01  | 6.12 (4.93, 7.31)       | < 0.01  | 6.62 (5.24, 8.00)       | < 0.01  | 3.14 (2.27, 4.02)       | < 0.01  |
| Pressure-pain threshold                                      | -20.59 (-32.28, -8.89)  | < 0.01  | -13.88 (-24.01, -3.74)  | 0.01    | -30.73 (-42.66, -18.81) | < 0.01  | -8.43 (-17.58, 0.72)    | 0.07    |
| Pain free isometric (wrist): ref. None                       |                         |         |                         |         |                         |         |                         |         |
| <i>Some or distinct pain</i>                                 | 22.44 (13.79, 31.09)    | < 0.01  | 19.34 (10.97, 27.70)    | < 0.01  | 20.15 (11.57, 28.74)    | < 0.01  | 15.98 (10.21, 21.75)    | < 0.01  |
| Pain free isometric(finger): ref. None                       |                         |         |                         |         |                         |         |                         |         |
| <i>Some or distinct pain</i>                                 | 20.62 (13.53, 27.70)    | < 0.01  | 22.54 (15.59, 29.49)    | < 0.01  | 16.39 (8.61, 24.17)     | < 0.01  | 15.67 (9.54, 21.79)     | < 0.01  |
