# Supplementary material for: Predictors for outcome in acute lateral epicondylitis
Source: Springer Nature journal article supplement (doi:10.1186/s12891-019-2758-y), 2019-08-17
Supplement: MOESM4 [file 17079084]

**Table 5 Adjusted MLR showing the effects of each prognostic indicator on pain (VAS) at each study time point (based on P ≤ 0.20 from the univariate analysis)**

| Covariates at baseline                                       | 6 weeks              |         | 12 weeks            |         | 26 weeks               |         | 52 weeks             |         |
|--------------------------------------------------------------|----------------------|---------|---------------------|---------|------------------------|---------|----------------------|---------|
|                                                              | β (95 % CI)          | P-value | β (95 % CI)         | P-value | β (95 % CI)            | P-value | β (95 % CI)          | P-value |
| Age                                                          | 0.14 (-0.10, 0.38)   | 0.25    | 0.08 (-0.15, 0.31)  | 0.48    | 0.14 (-0.10, 0.38)     | 0.26    | -0.06 (-0.25, 0.14)  | 0.58    |
| Female gender (ref. Male gender)                             | -1.55 (-5.89, 2.78)  | 0.48    | -1.64 (-5.83, 2.54) | 0.44    | 2.58 (-2.19, 7.35)     | 0.29    | -3.81 (-7.25, -0.36) | 0.03*   |
| Marital status (ref: unmarried/ widow(er))                   |                      |         |                     |         |                        |         |                      |         |
| <i>Married/cohabiting</i>                                    | -4.43 (-9.01, 0.15)  | 0.06    | 1.84 (-3.29, 6.96)  | 0.48    | 1.34 (-4.13, 6.80)     | 0.63    | 1.40 (-2.59, 5.38)   | 0.49    |
| Level of education x time (ref. primary or secondary school) |                      |         |                     |         |                        |         |                      |         |
| <i>College or University</i>                                 | -5.72 (-9.93, -1.50) | 0.01*   | -4.11 (-8.67, 0.44) | 0.08    | -2.53 (-8.48, 3.41)    | 0.40    | -2.57 (-6.34, 1.21)  | 0.18    |
| Exercises regularly                                          | -0.68 (-4.55, 3.19)  | 0.73    | 1.48 (-2.33, 5.29)  | 0.45    | -6.23 (-10.94, -1.53)  | 0.01*   | -1.57 (-4.72, 1.57)  | 0.33    |
| On paid work                                                 | 12.78 (3.12, 22.43)  | 0.01*   | 5.81 (-6.15, 17.78) | 0.34    | -11.58 (-20.85, -2.31) | 0.01*   | 0.26 (-6.27, 6.79)   | 0.94    |
| Manual labor                                                 | -2.10 (-6.23, 2.02)  | 0.32    | 0.28 (-4.25, 4.81)  | 0.90    | -3.13 (-8.36, 2.10)    | 0.24    | -3.04 (-6.68, 0.60)  | 0.10    |
| Duration of complaints in weeks                              | 0.18 (-0.51, 0.87)   | 0.61    | -0.25 (-0.93, 0.43) | 0.47    | 0.32 (-0.44, 1.07)     | 0.41    | 0.05 (-0.53, 0.63)   | 0.87    |
| Pain every day last week                                     | 1.52 (-9.67, 12.72)  | 0.79    | 0.23 (-9.40, 9.86)  | 0.96    | 1.90 (-9.69, 13.49)    | 0.75    | -2.12 (-9.74, 5.50)  | 0.59    |
| Acute start of symptoms                                      | -1.30 (-5.47, 2.87)  | 0.54    | 2.01 (-2.38, 6.40)  | 0.37    | -0.39 (-5.38, 4.59)    | 0.88    | 4.32 (0.86, 7.79)    | 0.01*   |
| Similar complaints earlier                                   | 0.54 (-4.26, 5.33)   | 0.83    | 1.49 (-3.23, 6.21)  | 0.54    | 2.26 (-3.27, 7.79)     | 0.42    | 3.44 (-0.40, 7.28)   | 0.08    |
| Probable over-use unusual activity                           | -2.69 (-7.11, 1.73)  | 0.23    | 2.87 (-1.63, 7.36)  | 0.21    | -4.81 (-10.04, 0.42)   | 0.07    | -3.53 (-7.11, 0.05)  | 0.06    |
| Patients preference for treatment: Physiotherapy             | 1.06 (-4.02, 6.15)   | 0.68    | 2.93 (-2.64, 8.49)  | 0.30    | -0.54 (-6.27, 5.18)    | 0.85    | 0.85 (-3.36, 5.07)   | 0.69    |
| Patients preference for treatment: Wait and see              | 1.07 (-7.35, 9.50)   | 0.80    | 7.80 (-1.17, 16.77) | 0.09    | -7.16 (-18.23, 3.91)   | 0.21    | 2.31 (-5.53, 10.16)  | 0.56    |
| Patients preference for treatment: No preference             | -4.22 (-9.46, 1.02)  | 0.11    | 2.19 (-3.31, 7.70)  | 0.44    | -0.71 (-6.38, 4.96)    | 0.81    | 1.04 (-3.40, 5.49)   | 0.65    |
| Baseline pain VAS                                            | 0.23 (0.12, 0.33)    | < 0.01* | 0.05 (-0.06, 0.15)  | 0.39    | 0.04 (-0.07, 0.15)     | 0.44    | 0.06 (-0.02, 0.15)   | 0.13    |
| Affected function on VAS                                     | 0.10 (-0.02, 0.22)   | 0.09    | -0.02 (-0.16, 0.13) | 0.81    | -0.21 (-0.38, -0.04)   | 0.02*   | 0.08 (-0.08, 0.25)   | 0.32    |
| Overall complaints on VAS                                    | 0.56 (0.44, 0.69)    | < 0.01* | 0.82 (0.67, 0.98)   | < 0.01  | 1.04 (0.86, 1.22)      | < 0.01* | 0.59 (0.42, 0.77)    | < 0.01* |
| Pain free grip strength ratio                                | -3.04 (-13.15, 7.08) | 0.56    | -1.40 (-8.73, 5.92) | 0.71    | -1.54 (-8.03, 4.94)    | 0.64    | -5.50 (-14.06, 3.07) | 0.21    |
| Maximum grip strength ratio                                  | -3.68 (-14.50, 7.14) | 0.51    | 2.26 (-7.10, 11.63) | 0.64    | 3.07 (-8.98, 15.12)    | 0.62    | -2.98 (-12.34, 6.39) | 0.53    |
| Pain Free Function Index                                     | 0.89 (-0.54, 2.32)   | 0.22    | 0.57 (-0.72, 1.86)  | 0.39    | 0.57 (-0.87, 2.02)     | 0.44    | 0.53 (-0.24, 1.30)   | 0.18    |
| Pain free isometric (wrist): ref. None                       |                      |         |                     |         |                        |         |                      |         |
| <i>Some or distinct pain</i>                                 | -1.56 (-8.77, 5.66)  | 0.67    | -1.87 (-8.43, 4.69) | 0.58    | 1.74 (-4.71, 8.19)     | 0.60    | 3.50 (-0.45, 7.44)   | 0.08    |
| Pain free isometric (3. finger): ref. None                   |                      |         |                     |         |                        |         |                      |         |
| <i>Some or distinct pain</i>                                 | 0.87 (-4.73, 6.47)   | 0.76    | 2.87 (-2.63, 8.38)  | 0.31    | 2.73 (-3.64, 9.10)     | 0.40    | 2.50 (-1.62, 6.61)   | 0.23    |

\*) p<0.05
